# Supplementary material
Source: HighWire-hosted journal article supplement (https://rapm.bmj.com/highwire/filestream/20831/field_highwire_adjunct_files/0/rapm-2022-103976supp001_data_supplement.pdf)

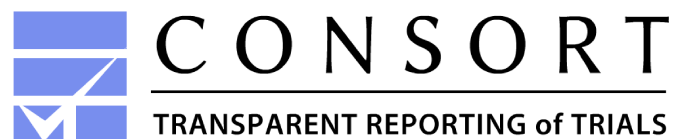

## CONSORT 2010 Flow Diagram

(Presented as figure 1 in the manuscript)

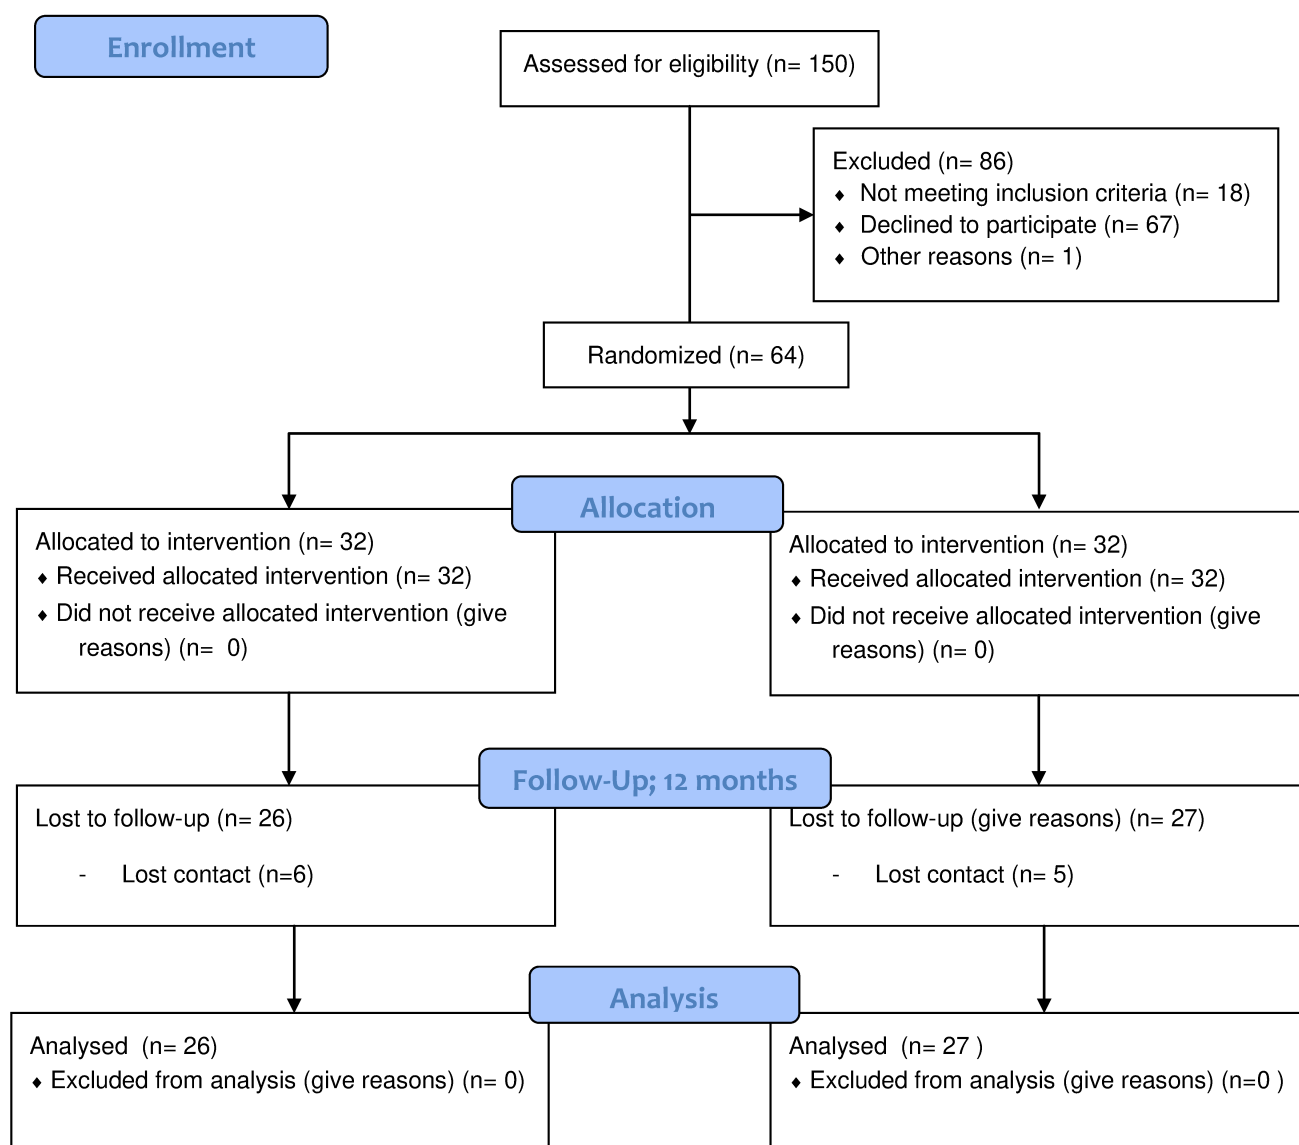

Supplement: rapm-2022-103976supp001_data_supplement.pdf [file rapm-2022-103976supp001_data_supplement.pdf]
